# Supplementary material
Source: PubMed Central journal article supplement (PMC6328974)
Supplement: ct8b00669_si_001.pdf [file ct8b00669_si_001.pdf]

Supporting information for:  
**SUPPORTING INFORMATION**  
Evaluating charge equilibration methods to  
generate electrostatic fields in nanoporous  
materials

Daniele Ongari,<sup>†</sup> Peter G. Boyd,<sup>†</sup> Ozge Kadioglu,<sup>‡</sup> Amber K. Mace,<sup>†</sup> Seda  
Keskin,<sup>‡</sup> and Berend Smit<sup>\*,†</sup>

<sup>†</sup>*Laboratory of Molecular Simulation, Institut des Sciences et Ingénierie Chimiques,  
Ecole Polytechnique Fédérale de Lausanne (EPFL), Rue de l'Industrie 17, CH-1951  
Sion, Valais, Switzerland*

<sup>‡</sup>*Department of Chemical and Biological Engineering, Koc University, Rumelifeneri  
Yolu, Sariyer, 34450 Istanbul, Turkey*

E-mail: berend.smit@epfl.ch

## Contents

|   |                                                                      |     |
|---|----------------------------------------------------------------------|-----|
| 1 | Supplementary information for ionization energies and computed radii | S3  |
| 2 | EQeq charge centers                                                  | S13 |
| 3 | Structures containing ClO <sub>4</sub> <sup>-</sup> ions             | S14 |
| 4 | Charge comparison for Cl and F                                       | S15 |
| 5 | Speed benchmark for the Qeq codes                                    | S16 |

|          |                                                          |            |
|----------|----------------------------------------------------------|------------|
| <b>6</b> | <b>Partial charges of CO<sub>2</sub></b>                 | <b>S17</b> |
| <b>7</b> | <b>Statistical coefficients used for the comparisons</b> | <b>S19</b> |
| 7.1      | Mean signed deviation . . . . .                          | S19        |
| 7.2      | Mean absolute deviation . . . . .                        | S19        |
| 7.3      | Pearson coefficient . . . . .                            | S19        |
| 7.4      | Spearman coefficient . . . . .                           | S19        |
|          | <b>References</b>                                        | <b>S21</b> |

# 1 Supplementary information for ionization energies and computed radii

Table S1: Lowest energy multiplicity for the CCSD(T)/aug-cc-pvqz calculations, considering multiplicities up to 11 or 12, for atoms with an even or odd number of electrons, respectively. The multiplicity is reported for ions from -5 to +5 charge.

|    | -5 | -4 | -3 | -2 | -1 | 0 | 1 | 2 | 3 | 4 | 5 |    | -5 | -4 | -3 | -2 | -1 | 0 | 1 | 2 | 3 | 4 | 5 |
|----|----|----|----|----|----|---|---|---|---|---|---|----|----|----|----|----|----|---|---|---|---|---|---|
| H  | 3  | 2  | 1  | 2  | 1  | 2 | 0 | 0 | 0 | 0 | 0 | Sc | 5  | 4  | 5  | 4  | 3  | 2 | 3 | 2 | 1 | 2 | 3 |
| He | 4  | 3  | 2  | 1  | 2  | 1 | 2 | 0 | 0 | 0 | 0 | Ti | 2  | 1  | 6  | 1  | 4  | 3 | 4 | 1 | 2 | 1 | 2 |
| Li | 3  | 6  | 3  | 2  | 1  | 2 | 1 | 2 | 0 | 0 | 0 | V  | 3  | 4  | 3  | 2  | 5  | 4 | 5 | 4 | 3 | 2 | 1 |
| Be | 2  | 5  | 4  | 3  | 2  | 1 | 2 | 1 | 2 | 0 | 0 | Cr | 8  | 9  | 4  | 5  | 6  | 7 | 6 | 3 | 4 | 3 | 2 |
| B  | 1  | 2  | 3  | 4  | 3  | 2 | 1 | 2 | 1 | 2 | 0 | Mn | 9  | 2  | 3  | 4  | 5  | 6 | 7 | 6 | 3 | 4 | 3 |
| C  | 2  | 1  | 2  | 3  | 4  | 3 | 2 | 1 | 2 | 1 | 2 | Fe | 4  | 5  | 8  | 3  | 6  | 5 | 6 | 5 | 6 | 5 | 4 |
| N  | 3  | 2  | 1  | 2  | 3  | 4 | 3 | 2 | 1 | 2 | 1 | Co | 7  | 4  | 7  | 6  | 3  | 4 | 3 | 4 | 5 | 6 | 3 |
| O  | 4  | 3  | 2  | 1  | 2  | 3 | 4 | 3 | 2 | 1 | 2 | Ni | 6  | 7  | 6  | 5  | 4  | 3 | 2 | 3 | 4 | 5 | 6 |
| F  | 1  | 6  | 1  | 2  | 1  | 2 | 3 | 4 | 3 | 2 | 1 | Cu | 3  | 2  | 3  | 2  | 1  | 2 | 1 | 2 | 3 | 4 | 5 |
| Ne | 4  | 3  | 4  | 1  | 2  | 1 | 2 | 3 | 4 | 3 | 2 | Zn | 4  | 5  | 2  | 1  | 2  | 1 | 2 | 1 | 2 | 3 | 4 |
| Na | 3  | 2  | 3  | 2  | 1  | 2 | 1 | 2 | 3 | 4 | 3 | Ga | 1  | 2  | 3  | 4  | 3  | 2 | 1 | 2 | 1 | 2 | 3 |
| Mg | 2  | 5  | 4  | 3  | 2  | 1 | 2 | 1 | 2 | 3 | 4 | Ge | 2  | 1  | 2  | 3  | 4  | 3 | 2 | 1 | 2 | 1 | 2 |
| Al | 1  | 4  | 3  | 4  | 3  | 2 | 1 | 2 | 1 | 2 | 3 | As | 3  | 2  | 1  | 2  | 3  | 4 | 3 | 2 | 1 | 2 | 1 |
| Si | 2  | 1  | 2  | 3  | 4  | 3 | 2 | 1 | 2 | 1 | 2 | Se | 4  | 1  | 4  | 1  | 2  | 3 | 4 | 3 | 2 | 1 | 2 |
| P  | 3  | 2  | 1  | 2  | 3  | 4 | 3 | 2 | 1 | 2 | 1 | Br | 1  | 4  | 1  | 2  | 1  | 2 | 3 | 4 | 3 | 2 | 1 |
| S  | 4  | 3  | 4  | 1  | 2  | 3 | 4 | 3 | 2 | 1 | 2 | Kr | 2  | 3  | 2  | 3  | 2  | 1 | 2 | 3 | 4 | 3 | 2 |
| Cl | 5  | 2  | 1  | 2  | 1  | 2 | 3 | 4 | 3 | 2 | 1 |    |    |    |    |    |    |   |   |   |   |   |   |
| Ar | 4  | 5  | 2  | 1  | 2  | 1 | 2 | 3 | 4 | 3 | 2 |    |    |    |    |    |    |   |   |   |   |   |   |

Table S2: Lowest energy multiplicity for the CCSD(T)/def2qzvpp calculations, considering multiplicities up to 11 or 12, for atoms with an even or odd number of electrons, respectively. The multiplicity is reported for ions from -5 to +5 charge.

|    | -5 | -4 | -3 | -2 | -1 | 0 | 1 | 2 | 3 | 4 | 5 |    | -5 | -4 | -3 | -2 | -1 | 0 | 1 | 2 | 3 | 4 | 5 |
|----|----|----|----|----|----|---|---|---|---|---|---|----|----|----|----|----|----|---|---|---|---|---|---|
| H  | 3  | 2  | 1  | 2  | 1  | 2 | 0 | 0 | 0 | 0 | 0 | Rb | 7  | 4  | 3  | 2  | 1  | 2 | 1 | 2 | 3 | 4 | 3 |
| He | 4  | 3  | 2  | 1  | 2  | 1 | 2 | 0 | 0 | 0 | 0 | Sr | 4  | 5  | 4  | 3  | 2  | 1 | 2 | 1 | 2 | 3 | 4 |
| Li | 3  | 4  | 5  | 2  | 1  | 2 | 1 | 2 | 0 | 0 | 0 | Y  | 3  | 6  | 5  | 4  | 3  | 2 | 1 | 2 | 1 | 2 | 3 |
| Be | 2  | 3  | 4  | 3  | 2  | 1 | 2 | 1 | 2 | 0 | 0 | Zr | 2  | 5  | 6  | 3  | 4  | 3 | 4 | 3 | 2 | 1 | 2 |
| B  | 1  | 2  | 3  | 4  | 3  | 2 | 1 | 2 | 1 | 2 | 0 | Nb | 7  | 4  | 9  | 4  | 5  | 6 | 5 | 2 | 3 | 2 | 1 |
| C  | 2  | 1  | 2  | 3  | 4  | 3 | 2 | 1 | 2 | 1 | 2 | Mo | 4  | 5  | 10 | 7  | 6  | 7 | 6 | 5 | 4 | 3 | 2 |
| N  | 3  | 2  | 1  | 2  | 3  | 4 | 3 | 2 | 1 | 2 | 1 | Tc | 5  | 2  | 9  | 8  | 5  | 6 | 7 | 6 | 5 | 4 | 3 |
| O  | 4  | 3  | 2  | 1  | 2  | 3 | 4 | 3 | 2 | 1 | 2 | Ru | 4  | 5  | 6  | 5  | 4  | 5 | 4 | 5 | 6 | 3 | 4 |
| F  | 3  | 4  | 3  | 2  | 1  | 2 | 3 | 4 | 3 | 2 | 1 | Rh | 1  | 2  | 7  | 6  | 3  | 4 | 3 | 4 | 5 | 6 | 5 |
| Ne | 2  | 3  | 4  | 3  | 2  | 1 | 2 | 3 | 4 | 3 | 2 | Pd | 4  | 5  | 2  | 1  | 2  | 1 | 2 | 3 | 4 | 5 | 6 |
| Na | 3  | 4  | 3  | 2  | 1  | 2 | 1 | 2 | 3 | 4 | 3 | Ag | 3  | 2  | 3  | 2  | 1  | 2 | 1 | 2 | 3 | 4 | 5 |
| Mg | 2  | 3  | 4  | 3  | 2  | 1 | 2 | 1 | 2 | 3 | 4 | Cd | 2  | 5  | 4  | 3  | 2  | 1 | 2 | 1 | 4 | 3 | 4 |
| Al | 1  | 2  | 3  | 4  | 3  | 2 | 1 | 2 | 1 | 2 | 3 | In | 1  | 2  | 3  | 4  | 3  | 2 | 1 | 2 | 1 | 2 | 3 |
| Si | 2  | 1  | 2  | 3  | 4  | 3 | 2 | 1 | 2 | 1 | 2 | Sn | 2  | 1  | 2  | 3  | 4  | 3 | 2 | 1 | 2 | 1 | 4 |
| P  | 3  | 2  | 1  | 2  | 3  | 4 | 3 | 2 | 1 | 2 | 1 | Sb | 1  | 2  | 1  | 2  | 3  | 4 | 3 | 2 | 1 | 2 | 1 |
| S  | 4  | 3  | 2  | 1  | 2  | 3 | 4 | 3 | 2 | 1 | 2 | Te | 2  | 1  | 2  | 1  | 2  | 3 | 4 | 3 | 2 | 1 | 2 |
| Cl | 3  | 4  | 3  | 2  | 1  | 2 | 3 | 4 | 3 | 2 | 1 | I  | 5  | 2  | 1  | 2  | 1  | 2 | 3 | 4 | 3 | 2 | 1 |
| Ar | 2  | 3  | 4  | 3  | 2  | 1 | 2 | 3 | 4 | 3 | 2 | Xe | 4  | 5  | 4  | 1  | 2  | 1 | 2 | 3 | 4 | 3 | 2 |
| K  | 3  | 2  | 3  | 2  | 1  | 2 | 1 | 2 | 3 | 4 | 3 | Cs | 1  | 4  | 3  | 2  | 1  | 2 | 1 | 2 | 3 | 4 | 3 |
| Ca | 2  | 3  | 4  | 3  | 2  | 1 | 2 | 1 | 2 | 3 | 4 | Ba | 2  | 3  | 4  | 3  | 4  | 1 | 2 | 1 | 2 | 3 | 4 |
| Sc | 3  | 4  | 5  | 2  | 3  | 2 | 3 | 2 | 1 | 2 | 3 | La | 7  | 6  | 3  | 2  | 3  | 4 | 3 | 2 | 1 | 2 | 3 |
| Ti | 2  | 5  | 6  | 5  | 4  | 3 | 4 | 1 | 2 | 1 | 2 | Hf | 8  | 7  | 6  | 1  | 4  | 3 | 4 | 3 | 2 | 1 | 2 |
| V  | 7  | 4  | 7  | 4  | 5  | 4 | 5 | 4 | 3 | 2 | 1 | Ta | 7  | 8  | 7  | 4  | 5  | 4 | 5 | 2 | 3 | 2 | 1 |
| Cr | 4  | 3  | 10 | 7  | 6  | 7 | 6 | 5 | 4 | 3 | 2 | W  | 10 | 3  | 10 | 7  | 6  | 7 | 6 | 5 | 4 | 3 | 2 |
| Mn | 5  | 4  | 3  | 10 | 9  | 6 | 7 | 6 | 5 | 4 | 3 | Re | 9  | 10 | 9  | 8  | 7  | 6 | 7 | 4 | 3 | 4 | 3 |
| Fe | 4  | 3  | 4  | 3  | 6  | 5 | 6 | 5 | 6 | 5 | 4 | Os | 4  | 7  | 8  | 5  | 4  | 5 | 6 | 7 | 6 | 5 | 4 |
| Co | 3  | 2  | 5  | 6  | 3  | 4 | 3 | 4 | 5 | 6 | 5 | Ir | 3  | 6  | 5  | 4  | 3  | 4 | 3 | 4 | 5 | 6 | 3 |
| Ni | 4  | 5  | 6  | 5  | 4  | 3 | 2 | 3 | 4 | 5 | 6 | Pt | 4  | 5  | 4  | 1  | 2  | 3 | 2 | 3 | 4 | 5 | 6 |
| Cu | 3  | 2  | 3  | 2  | 1  | 2 | 1 | 2 | 3 | 4 | 5 | Au | 1  | 4  | 3  | 2  | 1  | 2 | 1 | 2 | 3 | 4 | 5 |
| Zn | 2  | 3  | 4  | 3  | 2  | 1 | 2 | 1 | 2 | 3 | 4 | Hg | 2  | 3  | 4  | 3  | 2  | 1 | 2 | 1 | 2 | 3 | 4 |
| Ga | 1  | 2  | 3  | 4  | 3  | 2 | 1 | 2 | 1 | 4 | 3 | Tl | 1  | 2  | 3  | 4  | 3  | 2 | 1 | 2 | 1 | 2 | 3 |
| Ge | 2  | 1  | 2  | 3  | 4  | 3 | 2 | 1 | 2 | 1 | 2 | Pb | 2  | 1  | 2  | 3  | 4  | 3 | 2 | 1 | 2 | 1 | 2 |
| As | 3  | 2  | 1  | 2  | 3  | 4 | 3 | 2 | 1 | 2 | 1 | Bi | 1  | 2  | 1  | 2  | 3  | 4 | 3 | 2 | 1 | 2 | 1 |
| Se | 4  | 3  | 2  | 1  | 2  | 3 | 4 | 3 | 2 | 1 | 2 | Po | 4  | 1  | 2  | 1  | 2  | 3 | 4 | 3 | 2 | 1 | 2 |
| Br | 5  | 4  | 1  | 2  | 1  | 2 | 3 | 4 | 3 | 2 | 1 | At | 5  | 4  | 3  | 2  | 1  | 2 | 3 | 4 | 3 | 2 | 1 |
| Kr | 4  | 5  | 4  | 1  | 2  | 1 | 2 | 3 | 4 | 3 | 2 | Rn | 4  | 5  | 4  | 1  | 2  | 1 | 2 | 3 | 4 | 3 | 2 |

Table S3: Ionization energies  $IP_n$  (with  $n$  ranging from -5 to +4), computed with CCSD(T)/aug-cc-pvqz. Values are expressed in eV.

| atom | -5      | -4      | -3      | -2      | -1     | 0      | +1     | +2      | +3      | +4      |
|------|---------|---------|---------|---------|--------|--------|--------|---------|---------|---------|
| H    | -24.241 | -31.633 | 2.521   | -5.875  | 0.74   | 13.604 | -      | -       | -       | -       |
| He   | -35.625 | -28.22  | -20.746 | -7.917  | -2.631 | 24.564 | 54.418 | -       | -       | -       |
| Li   | -6.944  | -4.794  | -3.476  | -2.193  | 0.616  | 5.37   | 74.933 | 122.42  | -       | -       |
| Be   | -9.134  | -6.552  | -4.509  | -2.619  | -0.342 | 9.302  | 18.175 | 153.262 | 217.64  | -       |
| B    | -11.643 | -9.017  | -6.665  | -3.637  | 0.25   | 8.263  | 25.11  | 37.872  | 258.729 | 340.071 |
| C    | -16.938 | -11.974 | -8.891  | -5.606  | 1.246  | 11.235 | 24.324 | 47.821  | 64.412  | 391.425 |
| N    | -20.767 | -15.8   | -10.163 | -6.044  | -0.227 | 14.525 | 29.563 | 47.362  | 77.373  | 97.772  |
| O    | -22.76  | -17.924 | -14.441 | -6.08   | 1.404  | 13.529 | 35.113 | 54.881  | 77.277  | 113.747 |
| F    | -16.027 | -23.187 | -14.394 | -11.236 | 3.386  | 17.362 | 34.842 | 62.714  | 87.101  | 114.047 |
| Ne   | -31.968 | -20.689 | -16.072 | -10.615 | -5.287 | 21.547 | 40.875 | 63.26   | 97.231  | 126.183 |
| Na   | -7.827  | -2.21   | -2.991  | -1.868  | 0.547  | 5.016  | 47.613 | 74.748  | 102.995 | 140.046 |
| Mg   | -7.076  | -5.229  | -3.487  | -2.01   | -0.22  | 7.583  | 14.868 | 80.013  | 110.929 | 143.805 |
| Al   | -8.665  | -7.292  | -5.047  | -2.678  | 0.427  | 5.951  | 18.687 | 28.185  | 120.037 | 155.68  |
| Si   | -12.753 | -8.917  | -6.456  | -3.941  | 1.397  | 8.123  | 16.253 | 33.295  | 44.828  | 166.573 |
| P    | -15.16  | -11.752 | -7.291  | -4.097  | 0.686  | 10.492 | 19.708 | 30.049  | 51.176  | 64.639  |
| S    | -16.101 | -11.141 | -11.894 | -3.888  | 2.035  | 10.255 | 23.347 | 34.742  | 47.139  | 72.23   |
| Cl   | -23.672 | -8.642  | -8.784  | -7.537  | 3.605  | 12.893 | 23.651 | 39.619  | 53.059  | 67.437  |
| Ar   | -21.206 | -14.051 | -10.072 | -6.654  | -2.758 | 15.738 | 27.521 | 40.496  | 59.163  | 74.577  |
| Sc   | -6.497  | -5.809  | -2.443  | -2.617  | -0.526 | 6.504  | 15.892 | 21.459  | 73.304  | 91.342  |
| Ti   | -11.91  | -1.558  | -6.418  | -0.031  | 0.24   | 6.765  | 14.971 | 25.835  | 43.191  | 99.151  |
| V    | -8.304  | -5.859  | -3.821  | -3.203  | 0.608  | 6.982  | 14.193 | 29.377  | 46.765  | 65.255  |
| Cr   | -8.467  | -5.95   | -4.374  | -2.795  | 0.612  | 8.387  | 17.33  | 28.702  | 49.236  | 69.57   |
| Mn   | -7.738  | -6.948  | -4.441  | -2.568  | 1.738  | 5.287  | 15.463 | 36.9    | 48.62   | 72.905  |
| Fe   | -11.15  | -3.695  | -5.36   | -1.716  | -0.382 | 6.879  | 15.992 | 30.625  | 55.139  | 75.681  |
| Co   | -9.959  | -5.557  | -4.743  | -4.138  | 0.993  | 7.268  | 17.386 | 33.325  | 51.577  | 83.926  |
| Ni   | -9.598  | -6.41   | -4.716  | -2.793  | -0.4   | 7.411  | 18.295 | 35.614  | 55.034  | 76.196  |
| Cu   | -9.292  | -7.797  | -3.989  | -4.554  | 3.008  | 5.631  | 20.511 | 37.069  | 59.246  | 79.112  |
| Zn   | -10.306 | -6.743  | -5.388  | -2.48   | -0.515 | 9.186  | 17.622 | 40.073  | 59.973  | 83.986  |
| Ga   | -8.666  | -6.845  | -4.913  | -2.629  | 0.35   | 5.937  | 20.001 | 29.878  | 63.13   | 86.42   |
| Ge   | -12.231 | -8.506  | -6.15   | -3.798  | 1.383  | 7.913  | 15.711 | 33.296  | 44.586  | 90.561  |
| As   | -13.93  | -10.875 | -6.727  | -3.8    | 0.732  | 9.996  | 18.517 | 27.946  | 48.764  | 61.362  |
| Se   | -16.577 | -7.737  | -10.586 | -3.483  | 2.045  | 9.577  | 21.432 | 31.525  | 42.373  | 66.25   |
| Br   | -14.594 | -15.714 | -5.012  | -6.602  | 3.495  | 11.801 | 21.276 | 35.213  | 46.7    | 58.851  |
| Kr   | -22.202 | -6.655  | -8.134  | -5.567  | -2.11  | 14.136 | 24.296 | 35.346  | 51.138  | 63.912  |

Table S4: Ionization energies  $IP_n$  (with  $n$  ranging from -5 to +4), computed with CCSD(T)/def2qzvpp. Values are expressed in eV.

| atom | -5      | -4      | -3      | -2      | -1      | 0      | +1     | +2      | +3      | +4      |
|------|---------|---------|---------|---------|---------|--------|--------|---------|---------|---------|
| H    | -50.081 | -40.486 | -67.823 | 31.562  | 0.291   | 13.605 | -      | -       | -       | -       |
| He   | -77.929 | -64.211 | -50.406 | -20.552 | -11.098 | 24.562 | 54.418 | -       | -       | -       |
| Li   | -12.221 | -8.802  | -6.166  | -3.709  | 0.574   | 5.37   | 75.423 | 122.42  | -       | -       |
| Be   | -17.777 | -14.015 | -9.103  | -5.183  | -0.726  | 9.291  | 18.172 | 153.645 | 217.69  | -       |
| B    | -18.89  | -14.925 | -10.889 | -5.43   | 0.096   | 8.259  | 25.097 | 37.858  | 258.601 | 340.141 |
| C    | -28.441 | -18.548 | -13.396 | -7.987  | 1.093   | 11.227 | 24.322 | 47.8    | 64.396  | 391.26  |
| N    | -34.457 | -28.776 | -15.512 | -8.65   | -0.6    | 14.512 | 29.558 | 47.36   | 77.347  | 97.754  |
| O    | -37.818 | -31.497 | -25.149 | -8.496  | 1.076   | 13.496 | 35.107 | 54.877  | 77.279  | 113.708 |
| F    | -43.978 | -34.575 | -27.453 | -20.412 | 3.078   | 17.316 | 34.827 | 62.707  | 87.1    | 114.05  |
| Ne   | -42.864 | -35.775 | -25.995 | -18.85  | -11.68  | 21.486 | 40.849 | 63.233  | 97.206  | 126.159 |
| Na   | -10.369 | -7.244  | -5.229  | -3.17   | 0.527   | 5.105  | 47.033 | 72.165  | 100.339 | 139.777 |
| Mg   | -13.84  | -10.868 | -6.998  | -3.939  | -0.516  | 7.61   | 14.983 | 79.942  | 109.781 | 142.428 |
| Al   | -15.522 | -12.142 | -8.676  | -4.034  | 0.312   | 5.947  | 18.755 | 28.345  | 119.548 | 153.088 |
| Si   | -23.    | -14.401 | -10.106 | -5.603  | 1.304   | 8.124  | 16.27  | 33.373  | 44.984  | 166.348 |
| P    | -27.41  | -22.392 | -11.172 | -5.681  | 0.48    | 10.493 | 19.726 | 30.081  | 51.261  | 64.797  |
| S    | -28.259 | -23.257 | -18.327 | -5.157  | 1.88    | 10.246 | 23.36  | 34.768  | 47.181  | 72.328  |
| Cl   | -31.103 | -24.196 | -18.912 | -13.698 | 3.473   | 12.877 | 23.658 | 39.637  | 53.092  | 67.484  |
| Ar   | -32.621 | -26.975 | -19.453 | -13.834 | -8.218  | 15.714 | 27.522 | 40.51   | 59.187  | 74.617  |
| K    | -9.569  | -7.549  | -4.626  | -2.905  | 0.448   | 4.299  | 31.406 | 45.548  | 60.82   | 82.178  |
| Ca   | -10.675 | -8.394  | -5.351  | -2.931  | -0.104  | 6.062  | 11.786 | 50.647  | 66.891  | 84.145  |
| Sc   | -11.376 | -8.874  | -5.613  | -2.764  | -0.646  | 6.501  | 15.807 | 21.441  | 73.346  | 91.636  |
| Ti   | -11.665 | -9.208  | -5.785  | -3.586  | 0.122   | 6.759  | 14.958 | 25.753  | 43.174  | 99.413  |
| V    | -13.081 | -9.345  | -6.536  | -3.961  | 0.483   | 6.968  | 14.187 | 29.293  | 46.736  | 65.477  |
| Cr   | -13.181 | -9.522  | -6.802  | -4.129  | 0.498   | 8.319  | 14.852 | 31.098  | 49.201  | 69.732  |
| Mn   | -13.105 | -10.259 | -5.803  | -3.243  | 0.264   | 5.194  | 15.456 | 33.799  | 51.577  | 72.988  |
| Fe   | -13.508 | -10.385 | -7.034  | -2.829  | -0.649  | 6.783  | 15.981 | 30.49   | 55.058  | 75.716  |
| Co   | -14.37  | -10.477 | -7.035  | -5.693  | 0.93    | 7.252  | 17.273 | 33.203  | 51.422  | 79.969  |
| Ni   | -14.893 | -12.232 | -7.303  | -4.228  | -0.702  | 7.393  | 18.187 | 35.469  | 54.886  | 76.085  |
| Cu   | -13.973 | -11.565 | -7.809  | -4.853  | 2.887   | 5.689  | 20.393 | 36.93   | 57.491  | 80.591  |
| Zn   | -15.606 | -12.34  | -7.997  | -4.622  | -0.862  | 9.161  | 17.594 | 39.947  | 59.833  | 83.834  |
| Ga   | -17.203 | -13.468 | -9.626  | -4.462  | 0.162   | 5.934  | 20.115 | 30.133  | 90.457  | 99.139  |
| Ge   | -23.567 | -15.271 | -10.671 | -5.87   | 1.24    | 7.914  | 15.735 | 33.46   | 40.907  | 90.785  |
| As   | -26.168 | -21.263 | -10.632 | -5.371  | 0.514   | 9.998  | 18.541 | 27.997  | 48.987  | 61.759  |
| Se   | -27.863 | -22.937 | -18.286 | -4.784  | 1.865   | 9.566  | 21.452 | 31.566  | 42.436  | 66.517  |
| Br   | -28.393 | -27.521 | -13.927 | -14.316 | 3.355   | 11.785 | 21.292 | 35.249  | 46.755  | 58.93   |
| Kr   | -34.862 | -24.077 | -21.087 | -10.969 | -8.846  | 14.114 | 24.306 | 35.382  | 51.187  | 63.981  |
| Rb   | -7.486  | -5.934  | -4.241  | -2.481  | 0.459   | 4.124  | 27.262 | 38.994  | 51.438  | 69.297  |
| Sr   | -11.427 | -8.272  | -5.576  | -2.973  | -0.122  | 5.653  | 10.965 | 43.079  | 56.289  | 70.148  |
| Y    | -12.159 | -8.531  | -6.309  | -3.017  | -0.438  | 5.985  | 13.092 | 19.532  | 60.891  | 75.361  |
| Zr   | -12.573 | -9.407  | -5.608  | -3.873  | 0.375   | 6.589  | 14.978 | 25.298  | 29.58   | 81.045  |
| Nb   | -12.905 | -9.234  | -6.405  | -3.872  | 0.776   | 6.982  | 15.268 | 23.525  | 37.375  | 50.172  |
| Mo   | -12.775 | -9.173  | -6.515  | -3.954  | 0.62    | 8.573  | 14.548 | 26.991  | 39.957  | 54.092  |
| Tc   | -12.602 | -9.957  | -6.391  | -3.908  | 0.214   | 7.036  | 15.186 | 29.71   | 42.528  | 57.196  |
| Ru   | -13.485 | -9.477  | -7.033  | -4.247  | 1.495   | 6.702  | 16.432 | 27.917  | 48.574  | 57.794  |
| Rh   | -14.979 | -10.194 | -6.495  | -4.238  | -0.034  | 7.427  | 18.015 | 30.499  | 44.094  | 64.488  |
| Pd   | -15.666 | -11.101 | -8.78   | -4.258  | 0.376   | 8.314  | 19.27  | 32.857  | 47.288  | 62.561  |
| Ag   | -16.56  | -6.857  | -7.543  | -4.428  | 1.229   | 7.529  | 21.46  | 34.64   | 50.236  | 66.388  |
| Cd   | -16.107 | -12.309 | -8.045  | -4.651  | -0.876  | 8.93   | 16.845 | 50.931  | 39.052  | 69.861  |
| In   | -13.128 | -10.306 | -7.411  | -3.503  | 0.351   | 5.559  | 18.757 | 27.889  | 55.717  | 72.334  |
| Sn   | -18.105 | -11.574 | -8.16   | -4.544  | 1.37    | 7.297  | 14.203 | 30.372  | 40.62   | 103.421 |
| Sb   | -20.403 | -16.188 | -8.655  | -4.299  | 0.756   | 9.099  | 16.534 | 24.665  | 43.547  | 54.789  |
| Te   | -25.726 | -17.196 | -12.701 | -3.791  | 1.947   | 8.682  | 18.939 | 27.55   | 36.725  | 58.226  |
| I    | -23.516 | -19.229 | -13.502 | -8.759  | 3.217   | 10.528 | 18.706 | 30.522  | 40.167  | 50.306  |
| Xe   | -25.667 | -19.196 | -15.222 | -9.623  | -4.427  | 12.418 | 21.101 | 30.459  | 43.626  | 54.204  |
| Cs   | -7.314  | -5.586  | -3.861  | -2.2    | 0.456   | 3.865  | 23.259 | 33.028  | 43.365  | 57.924  |
| Ba   | -9.885  | -7.747  | -4.83   | -4.066  | 1.5     | 5.126  | 9.848  | 36.472  | 47.338  | 58.599  |
| La   | -11.04  | -7.81   | -5.805  | -3.467  | 0.812   | 5.323  | 12.364 | 17.334  | 50.708  | 62.43   |
| Hf   | -16.375 | -12.3   | -6.43   | -5.5    | -0.37   | 7.129  | 13.975 | 23.801  | 30.656  | 81.571  |
| Ta   | -16.881 | -12.026 | -8.274  | -5.123  | 0.145   | 7.381  | 15.86  | 26.079  | 37.561  | 41.954  |
| W    | -16.669 | -12.65  | -9.095  | -5.093  | 0.947   | 8.413  | 15.348 | 25.536  | 37.545  | 50.601  |
| Re   | -17.445 | -13.298 | -8.588  | -4.689  | -0.485  | 7.634  | 18.122 | 28.521  | 37.715  | 53.136  |
| Os   | -15.856 | -11.954 | -8.119  | -5.266  | 0.629   | 8.992  | 16.212 | 26.504  | 42.78   | 55.827  |
| Ir   | -17.353 | -11.999 | -8.771  | -5.409  | 1.701   | 9.152  | 16.994 | 28.844  | 40.928  | 61.786  |
| Pt   | -16.702 | -12.114 | -9.35   | -4.928  | 2.398   | 8.532  | 19.402 | 29.961  | 43.901  | 57.292  |
| Au   | -15.313 | -10.653 | -7.839  | -4.944  | 3.852   | 7.421  | 20.625 | 32.521  | 46.123  | 60.729  |
| Hg   | -16.759 | -13.231 | -8.536  | -4.918  | -0.996  | 10.316 | 18.627 | 35.084  | 48.411  | 63.592  |
| Tl   | -12.681 | -9.959  | -7.169  | -3.445  | 0.262   | 5.374  | 20.283 | 29.664  | 51.241  | 65.685  |
| Pb   | -17.805 | -11.503 | -8.099  | -4.514  | 1.258   | 7      | 13.665 | 31.718  | 42.072  | 69.214  |
| Bi   | -19.831 | -15.604 | -8.583  | -4.274  | 0.657   | 8.703  | 15.819 | 23.574  | 44.549  | 55.8    |
| Po   | -19.952 | -16.22  | -11.884 | -3.524  | 1.837   | 8.242  | 18.015 | 26.155  | 34.801  | 58.617  |
| At   | -20.186 | -16.306 | -12.525 | -8.093  | 3.046   | 9.951  | 17.674 | 28.819  | 37.836  | 47.285  |
| Rn   | -22.144 | -16.231 | -12.801 | -7.871  | -2.984  | 11.697 | 19.852 | 28.618  | 40.939  | 50.753  |

Table S5: Comparison of experimental<sup>S1,S2</sup> and CCSD(T)/aug-cc-pvqz ionization potentials. The signed deviation (eV) is reported as  $\Delta IP_n = IP_n^{exp.} - IP_n^{CC}$ .

|    | -1    | 0     | 1     | 2     | 3     | 4     |
|----|-------|-------|-------|-------|-------|-------|
| H  | 0.01  | -0.01 | -     | -     | -     | -     |
| He | 2.63  | 0.02  | 0.00  | -     | -     | -     |
| Li | 0.00  | 0.02  | 0.71  | 0.03  | -     | -     |
| Be | 0.34  | 0.02  | 0.04  | 0.63  | 0.07  | -     |
| B  | 0.03  | 0.04  | 0.04  | 0.06  | 0.64  | 0.15  |
| C  | 0.02  | 0.03  | 0.06  | 0.07  | 0.08  | 0.65  |
| N  | 0.16  | 0.01  | 0.04  | 0.09  | 0.10  | 0.12  |
| O  | 0.06  | 0.09  | 0.00  | 0.05  | 0.13  | 0.15  |
| F  | 0.02  | 0.06  | 0.13  | -0.01 | 0.04  | 0.19  |
| Ne | 5.29  | 0.02  | 0.09  | 0.19  | -0.12 | 0.03  |
| Na | 0.00  | 0.12  | -0.33 | -3.11 | -4.09 | -1.66 |
| Mg | 0.22  | 0.06  | 0.17  | 0.13  | -1.69 | -2.54 |
| Al | 0.01  | 0.04  | 0.14  | 0.26  | -0.05 | -1.97 |
| Si | -0.01 | 0.03  | 0.09  | 0.20  | 0.31  | 0.20  |
| P  | 0.06  | -0.03 | 0.02  | 0.13  | 0.19  | 0.38  |
| S  | 0.04  | 0.10  | -0.02 | 0.09  | 0.16  | 0.45  |
| Cl | 0.01  | 0.07  | 0.16  | -0.01 | 0.40  | 0.36  |
| Ar | 2.76  | 0.02  | 0.11  | 0.24  | 0.65  | 0.44  |
| Sc | 0.71  | 0.04  | -3.09 | 3.30  | 0.17  | 0.32  |
| Ti | -0.16 | 0.06  | -1.39 | 1.66  | 0.07  | 0.07  |
| V  | -0.08 | -0.24 | 0.46  | -0.07 | -0.06 | -0.03 |
| Cr | 0.06  | -1.62 | -0.83 | 2.26  | -0.14 | -0.27 |
| Mn | -1.74 | 2.15  | 0.18  | -3.23 | 2.58  | -0.51 |
| Fe | 0.53  | 0.99  | 0.19  | 0.03  | -0.34 | -0.68 |
| Co | -0.33 | 0.59  | -0.33 | 0.17  | -0.28 | -4.43 |
| Ni | 1.56  | 0.22  | -0.13 | -0.44 | -0.13 | -0.70 |
| Cu | -1.77 | 2.10  | -0.22 | -0.24 | -4.05 | 0.79  |
| Zn | 0.52  | 0.21  | 0.34  | -0.35 | -0.57 | -1.39 |
| Ga | 0.06  | 0.06  | 0.51  | 0.83  | 0.87  | -     |
| Ge | -0.15 | -0.01 | 0.22  | 0.92  | 1.12  | 2.94  |
| As | 0.08  | -0.19 | 0.12  | 0.40  | 1.37  | 1.27  |
| Se | -0.02 | 0.18  | -0.24 | -0.70 | 0.57  | 2.05  |
| Br | -0.13 | 0.01  | 0.52  | 0.79  | 0.60  | 0.85  |
| Kr | 2.11  | -0.14 | 0.06  | 1.60  | 1.36  | 0.79  |

Table S6: Comparison of experimental<sup>S1,S2</sup> and CCSD(T)/def2qzvpp ionization energies. The signed deviation (eV) is reported as  $\Delta IP_n = IP_n^{exp.} - IP_n^{CC}$ .

|    | -1    | 0     | 1     | 2     | 3      | 4     |    | -1    | 0     | 1     | 2      | 3     | 4      |
|----|-------|-------|-------|-------|--------|-------|----|-------|-------|-------|--------|-------|--------|
| H  | 0.46  | -0.01 | -     | -     | -      | -     | Rb | 0.03  | 0.05  | 0.02  | 1.01   | 1.16  | 1.70   |
| He | 11.10 | 0.02  | 0.00  | -     | -      | -     | Sr | 0.17  | 0.04  | 0.06  | 0.52   | 0.71  | 1.45   |
| Li | 0.04  | 0.02  | 0.22  | 0.03  | -      | -     | Y  | 0.75  | 0.40  | -0.85 | 0.99   | 0.91  | 1.64   |
| Be | 0.73  | 0.03  | 0.04  | 0.25  | 0.02   | -     | Zr | 0.05  | 0.25  | -1.85 | -2.31  | 4.76  | 0.45   |
| B  | 0.18  | 0.04  | 0.06  | 0.07  | 0.77   | 0.08  | Nb | 0.12  | -0.10 | -0.95 | 1.52   | 0.92  | 0.38   |
| C  | 0.17  | 0.03  | 0.06  | 0.09  | 0.10   | 0.82  | Mo | 0.13  | -1.47 | 1.60  | 0.17   | 6.44  | 7.11   |
| N  | 0.53  | 0.02  | 0.04  | 0.09  | 0.13   | 0.13  | Tc | 0.34  | 0.24  | 0.07  | -0.17  | -     | -      |
| O  | 0.39  | 0.12  | 0.01  | 0.06  | 0.13   | 0.19  | Ru | -0.45 | 0.67  | 0.33  | 0.55   | -     | -      |
| F  | 0.32  | 0.11  | 0.14  | 0.00  | 0.04   | 0.19  | Rh | 1.18  | 0.03  | 0.06  | 0.56   | -     | -      |
| Ne | 11.68 | 0.08  | 0.11  | 0.22  | -0.10  | 0.05  | Pd | 0.19  | 0.03  | 0.16  | 0.07   | -     | -      |
| Na | 0.02  | 0.03  | 0.25  | -0.52 | -1.43  | -1.39 | Ag | 0.08  | 0.05  | 0.03  | 0.19   | -     | -      |
| Mg | 0.52  | 0.04  | 0.05  | 0.20  | -0.54  | -1.17 | Cd | 0.88  | 0.06  | 0.06  | -13.45 | -     | -      |
| Al | 0.12  | 0.04  | 0.07  | 0.10  | 0.44   | 0.62  | In | 0.05  | 0.23  | 0.11  | 0.14   | -1.72 | -      |
| Si | 0.09  | 0.03  | 0.08  | 0.12  | 0.16   | 0.42  | Sn | -0.26 | 0.05  | 0.43  | 0.13   | 0.11  | -31.14 |
| P  | 0.27  | -0.04 | 0.00  | 0.10  | 0.11   | 0.23  | Sb | 0.29  | -0.46 | 0.00  | 0.63   | 0.65  | 1.21   |
| S  | 0.20  | 0.11  | -0.03 | 0.06  | 0.12   | 0.35  | Te | 0.02  | 0.33  | -0.34 | 0.41   | 0.68  | 0.52   |
| Cl | 0.14  | 0.09  | 0.15  | -0.03 | 0.37   | 0.32  | I  | -0.16 | -0.08 | 0.42  | 2.48   | -     | -      |
| Ar | 8.22  | 0.04  | 0.11  | 0.23  | 0.62   | 0.40  | Xe | 4.43  | -0.29 | 0.11  | 1.64   | -     | -      |
| K  | 0.05  | 0.04  | 0.22  | 0.17  | 0.09   | 0.48  | Cs | 0.02  | 0.03  | 1.84  | -      | -     | -      |
| Ca | 0.13  | 0.05  | 0.09  | 0.26  | 0.21   | 0.26  | Ba | -1.36 | 0.09  | 0.16  | -      | -     | -      |
| Sc | 0.83  | 0.04  | -3.01 | 3.32  | 0.12   | 0.02  | La | -0.34 | 0.25  | -1.30 | 1.84   | -     | -      |
| Ti | -0.04 | 0.06  | -1.38 | 1.74  | 0.09   | -0.19 | Hf | 0.37  | -0.13 | 0.93  | -0.50  | 2.64  | -      |
| V  | 0.04  | -0.23 | 0.46  | 0.02  | -0.03  | -0.25 | Ta | 0.18  | 0.51  | -     | -      | -     | -      |
| Cr | 0.18  | -1.55 | 1.65  | -0.14 | -0.10  | -0.43 | W  | -0.13 | -0.43 | -     | -      | -     | -      |
| Mn | -0.26 | 2.24  | 0.18  | -0.13 | -0.38  | -0.59 | Re | 0.50  | 0.25  | -     | -      | -     | -      |
| Fe | 0.80  | 1.09  | 0.20  | 0.16  | -0.26  | -0.72 | Os | 0.45  | -0.29 | -     | -      | -     | -      |
| Co | -0.27 | 0.61  | -0.21 | 0.30  | -0.12  | -0.47 | Ir | -0.14 | -0.05 | -     | -      | -     | -      |
| Ni | 1.86  | 0.24  | -0.02 | -0.30 | 0.01   | -0.59 | Pt | -0.27 | 0.47  | -0.84 | -      | -     | -      |
| Cu | -1.65 | 2.04  | -0.10 | -0.10 | -2.29  | -0.69 | Au | -1.54 | 1.80  | -0.13 | -      | -     | -      |
| Zn | 0.86  | 0.23  | 0.37  | -0.23 | -0.43  | -1.23 | Hg | 1.00  | 0.12  | 0.13  | -0.88  | -     | -      |
| Ga | 0.25  | 0.06  | 0.40  | 0.58  | -26.46 | -     | Tl | 0.12  | 0.73  | 0.15  | 0.17   | -     | -      |
| Ge | -0.01 | -0.01 | 0.20  | 0.76  | 0.80   | 2.72  | Pb | -0.89 | 0.42  | 1.37  | 0.22   | 0.25  | -0.41  |
| As | 0.30  | -0.19 | 0.09  | 0.35  | 1.14   | 0.87  | Bi | 0.29  | -1.41 | 0.87  | 1.99   | 0.75  | 0.20   |
| Se | 0.16  | 0.19  | -0.26 | -0.75 | 0.51   | 1.78  | Po | 0.06  | 0.18  | -     | -      | -     | -      |
| Br | 0.01  | 0.03  | 0.51  | 0.75  | 0.54   | 0.77  |    |       |       |       |        |       |        |
| Kr | 8.85  | -0.12 | 0.05  | 1.57  | 1.31   | 0.72  |    |       |       |       |        |       |        |



Table S7: Comparison of CCSD(T)/def2qzvpp and CCSD(T)/aug-cc-pvqz ionization potentials. The signed deviation (eV) is reported as  $\Delta IP_n = IP_n^{CC/def2} - IP_n^{CC/aug}$ .

|    | -5     | -4     | -3     | -2     | -1    | 0     | 1     | 2     | 3     | 4      |
|----|--------|--------|--------|--------|-------|-------|-------|-------|-------|--------|
| H  | -25.84 | -8.85  | -70.34 | 37.44  | -0.45 | 0.00  | -     | -     | -     | -      |
| He | -42.30 | -35.99 | -29.66 | -12.64 | -8.47 | 0.00  | 0.00  | -     | -     | -      |
| Li | -5.28  | -4.01  | -2.69  | -1.52  | -0.04 | 0.00  | 0.49  | 0.00  | -     | -      |
| Be | -8.64  | -7.46  | -4.59  | -2.56  | -0.38 | -0.01 | 0.00  | 0.38  | 0.05  | -      |
| B  | -7.25  | -5.91  | -4.22  | -1.79  | -0.15 | 0.00  | -0.01 | -0.01 | -0.13 | 0.07   |
| C  | -11.50 | -6.57  | -4.51  | -2.38  | -0.15 | -0.01 | 0.00  | -0.02 | -0.02 | -0.16  |
| N  | -13.69 | -12.98 | -5.35  | -2.61  | -0.37 | -0.01 | -0.01 | 0.00  | -0.03 | -0.02  |
| O  | -15.06 | -13.57 | -10.71 | -2.42  | -0.33 | -0.03 | -0.01 | 0.00  | 0.00  | -0.04  |
| F  | -27.95 | -11.39 | -13.06 | -9.18  | -0.31 | -0.05 | -0.02 | -0.01 | 0.00  | 0.00   |
| Ne | -10.90 | -15.09 | -9.92  | -8.24  | -6.39 | -0.06 | -0.03 | -0.03 | -0.03 | -0.02  |
| Na | -2.54  | -5.03  | -2.24  | -1.30  | -0.02 | 0.09  | -0.58 | -2.58 | -2.66 | -0.27  |
| Mg | -6.76  | -5.64  | -3.51  | -1.93  | -0.30 | 0.03  | 0.12  | -0.07 | -1.15 | -1.38  |
| Al | -6.86  | -4.85  | -3.63  | -1.36  | -0.12 | 0.00  | 0.07  | 0.16  | -0.49 | -2.59  |
| Si | -10.25 | -5.48  | -3.65  | -1.66  | -0.09 | 0.00  | 0.02  | 0.08  | 0.16  | -0.23  |
| P  | -12.25 | -10.64 | -3.88  | -1.58  | -0.21 | 0.00  | 0.02  | 0.03  | 0.09  | 0.16   |
| S  | -12.16 | -12.12 | -6.43  | -1.27  | -0.16 | -0.01 | 0.01  | 0.03  | 0.04  | 0.10   |
| Cl | -7.43  | -15.55 | -10.13 | -6.16  | -0.13 | -0.02 | 0.01  | 0.02  | 0.03  | 0.05   |
| Ar | -11.42 | -12.92 | -9.38  | -7.18  | -5.46 | -0.02 | 0.00  | 0.01  | 0.02  | 0.04   |
| Sc | -4.88  | -3.07  | -3.17  | -0.15  | -0.12 | 0.00  | -0.09 | -0.02 | 0.04  | 0.29   |
| Ti | 0.25   | -7.65  | 0.63   | -3.56  | -0.12 | -0.01 | -0.01 | -0.08 | -0.02 | 0.26   |
| V  | -4.78  | -3.49  | -2.72  | -0.76  | -0.13 | -0.01 | -0.01 | -0.08 | -0.03 | 0.22   |
| Cr | -4.71  | -3.57  | -2.43  | -1.33  | -0.11 | -0.07 | -2.48 | 2.40  | -0.04 | 0.16   |
| Mn | -5.37  | -3.31  | -1.36  | -0.68  | -1.47 | -0.09 | -0.01 | -3.10 | 2.96  | 0.08   |
| Fe | -2.36  | -6.69  | -1.67  | -1.11  | -0.27 | -0.10 | -0.01 | -0.14 | -0.08 | 0.03   |
| Co | -4.41  | -4.92  | -2.29  | -1.56  | -0.06 | -0.02 | -0.11 | -0.12 | -0.15 | -3.96  |
| Ni | -5.30  | -5.82  | -2.59  | -1.44  | -0.30 | -0.02 | -0.11 | -0.15 | -0.15 | -0.11  |
| Cu | -4.68  | -3.77  | -3.82  | -0.30  | -0.12 | 0.06  | -0.12 | -0.14 | -1.76 | 1.48   |
| Zn | -5.30  | -5.60  | -2.61  | -2.14  | -0.35 | -0.03 | -0.03 | -0.13 | -0.14 | -0.15  |
| Ga | -8.54  | -6.62  | -4.71  | -1.83  | -0.19 | 0.00  | 0.11  | 0.25  | 27.33 | -27.28 |
| Ge | -11.34 | -6.77  | -4.52  | -2.07  | -0.14 | 0.00  | 0.02  | 0.16  | 0.32  | 0.22   |
| As | -12.24 | -10.39 | -3.91  | -1.57  | -0.22 | 0.00  | 0.02  | 0.05  | 0.22  | 0.40   |
| Se | -11.29 | -15.20 | -7.70  | -1.30  | -0.18 | -0.01 | 0.02  | 0.04  | 0.06  | 0.27   |
| Br | -13.80 | -11.81 | -8.92  | -7.71  | -0.14 | -0.02 | 0.02  | 0.04  | 0.06  | 0.08   |
| Kr | -12.66 | -17.42 | -12.95 | -5.40  | -6.74 | -0.02 | 0.01  | 0.04  | 0.05  | 0.07   |

Table S8: Comparison of electronegativity and idempotential (related to the neutral state) as reported or computed. Atoms from H to Sb. Values are expressed in eV.

| Atom | GMP        |            | experimental <sup>S1,S2</sup> |            | MEPO fit   |            | CCSD(T)/def2qzvpp |            |
|------|------------|------------|-------------------------------|------------|------------|------------|-------------------|------------|
|      | $\chi_A^0$ | $J_{AA}^0$ | $\chi_A^0$                    | $J_{AA}^0$ | $\chi_A^0$ | $J_{AA}^0$ | $\chi_A^0$        | $J_{AA}^0$ |
| H    | 4.53       | 13.89      | 7.18                          | 12.84      |            |            | 6.95              | 13.31      |
| He   | 9.66       | 29.84      | 12.29                         | 24.59      |            |            | 6.73              | 35.66      |
| Li   | 3.01       | 4.77       | 3.01                          | 4.77       |            |            | 2.97              | 4.80       |
| Be   | 4.88       | 8.89       | 4.66                          | 9.32       |            |            | 4.28              | 10.02      |
| B    | 5.11       | 9.50       | 4.29                          | 8.02       |            |            | 4.18              | 8.16       |
| C    | 5.34       | 10.13      | 6.26                          | 10.00      | 5.43       | 11.71      | 6.16              | 10.13      |
| N    | 6.90       | 11.76      | 7.23                          | 14.60      | 6.69       | 13.24      | 6.96              | 15.11      |
| O    | 8.74       | 13.36      | 7.54                          | 12.16      | 8.71       | 17.14      | 7.29              | 12.42      |
| F    | 10.87      | 14.95      | 10.41                         | 14.02      | 6.42       | 22.26      | 10.20             | 14.24      |
| Ne   | 11.04      | 21.10      | 10.78                         | 21.56      |            |            | 4.90              | 33.17      |
| Na   | 2.84       | 4.59       | 2.84                          | 4.59       |            |            | 2.82              | 4.58       |
| Mg   | 3.95       | 7.39       | 3.82                          | 7.65       |            |            | 3.55              | 8.13       |
| Al   | 4.06       | 7.18       | 3.21                          | 5.55       |            |            | 3.13              | 5.64       |
| Si   | 4.17       | 6.97       | 4.77                          | 6.76       |            |            | 4.71              | 6.82       |
| P    | 5.46       | 8.00       | 5.60                          | 9.71       |            |            | 5.49              | 10.01      |
| S    | 6.93       | 8.97       | 6.22                          | 8.28       |            |            | 6.06              | 8.37       |
| Cl   | 8.56       | 9.89       | 8.29                          | 9.35       | 5.82       | 14.55      | 8.18              | 9.40       |
| Ar   | 9.47       | 12.71      | 7.88                          | 15.76      |            |            | 3.75              | 23.93      |
| K    | 2.42       | 3.84       | 2.42                          | 3.84       |            |            | 2.37              | 3.85       |
| Ca   | 3.23       | 5.76       | 3.07                          | 6.09       |            |            | 2.98              | 6.17       |
| Sc   | 3.40       | 6.16       | 3.36                          | 6.35       |            |            | 2.93              | 7.15       |
| Ti   | 3.47       | 6.76       | 3.45                          | 6.74       |            |            | 3.44              | 6.64       |
| V    | 3.65       | 6.82       | 3.63                          | 6.22       | 4.09       | 8.43       | 3.73              | 6.49       |
| Cr   | 3.42       | 7.73       | 3.72                          | 6.09       |            |            | 4.41              | 7.82       |
| Mn   | 3.33       | 8.21       | 3.72                          | 7.44       |            |            | 2.73              | 4.93       |
| Fe   | 3.76       | 8.28       | 4.01                          | 7.72       |            |            | 3.07              | 7.43       |
| Co   | 4.11       | 8.35       | 4.26                          | 7.20       |            |            | 4.09              | 6.32       |
| Ni   | 4.47       | 8.41       | 4.40                          | 6.48       |            |            | 3.35              | 8.10       |
| Cu   | 4.20       | 8.44       | 4.48                          | 6.49       | 5.43       | 6.94       | 4.29              | 2.80       |
| Zn   | 5.11       | 8.57       | 4.70                          | 9.39       | 3.70       | 8.93       | 4.15              | 10.02      |
| Ga   | 3.64       | 6.32       | 3.20                          | 5.59       |            |            | 3.05              | 5.77       |
| Ge   | 4.05       | 6.88       | 4.57                          | 6.67       |            |            | 4.58              | 6.67       |
| As   | 5.19       | 7.62       | 5.31                          | 9.00       |            |            | 5.26              | 9.48       |
| Se   | 6.43       | 8.26       | 5.89                          | 7.73       |            |            | 5.72              | 7.70       |
| Br   | 7.79       | 8.85       | 7.59                          | 8.45       | 5.69       | 17.52      | 7.57              | 8.43       |
| Kr   | 8.51       | 11.43      | 7.00                          | 14.00      |            |            | 2.63              | 22.96      |
| Rb   | 2.33       | 3.69       | 2.33                          | 3.69       |            |            | 2.29              | 3.67       |
| Sr   | 3.02       | 4.88       | 2.87                          | 5.64       |            |            | 2.77              | 5.78       |
| Y    | 3.83       | 5.62       | 3.34                          | 6.07       |            |            | 2.77              | 6.42       |
| Zr   | 3.40       | 7.10       | 3.63                          | 6.41       |            |            | 3.48              | 6.21       |
| Nb   | 3.55       | 6.76       | 3.89                          | 5.99       |            |            | 3.88              | 6.21       |
| Mo   | 3.47       | 7.51       | 3.92                          | 6.35       |            |            | 4.60              | 7.95       |
| Tc   | 3.29       | 7.98       | 3.92                          | 6.73       |            |            | 3.63              | 6.82       |
| Ru   | 3.58       | 8.03       | 4.21                          | 6.32       |            |            | 4.10              | 5.21       |
| Rh   | 3.98       | 8.01       | 4.30                          | 6.32       |            |            | 3.70              | 7.46       |
| Pd   | 4.32       | 8.00       | 4.45                          | 7.78       |            |            | 4.35              | 7.94       |
| Ag   | 4.44       | 6.27       | 4.44                          | 6.27       |            |            | 4.38              | 6.30       |
| Cd   | 5.03       | 7.91       | 4.50                          | 8.99       |            |            | 4.03              | 9.81       |
| In   | 3.51       | 5.79       | 3.10                          | 5.38       |            |            | 2.96              | 5.21       |
| Sn   | 3.99       | 6.25       | 4.23                          | 6.23       |            |            | 4.33              | 5.93       |
| Sb   | 4.90       | 6.68       | 4.84                          | 7.59       |            |            | 4.93              | 8.34       |

Table S9: Comparison of electronegativity and idempotential (related to the neutral state) as reported or computed. Atoms from Te to Lr. Values are expressed in eV.

| Atom | GMP        |            | experimental <sup>S1,S2</sup> |            | MEPO fit   |            | CCSD(T)/def2qzvpp |            |
|------|------------|------------|-------------------------------|------------|------------|------------|-------------------|------------|
|      | $\chi_A^0$ | $J_{AA}^0$ | $\chi_A^0$                    | $J_{AA}^0$ | $\chi_A^0$ | $J_{AA}^0$ | $\chi_A^0$        | $J_{AA}^0$ |
| Te   | 5.82       | 7.05       | 5.49                          | 7.04       |            |            | 5.31              | 6.74       |
| I    | 6.82       | 7.52       | 6.76                          | 7.39       | 5.43       | 11.44      | 6.87              | 7.31       |
| Xe   | 7.60       | 9.95       | 6.07                          | 12.13      |            |            | 4.00              | 16.85      |
| Cs   | 2.18       | 3.42       | 2.18                          | 3.42       |            |            | 2.16              | 3.41       |
| Ba   | 2.81       | 4.79       | 2.68                          | 5.07       |            |            | 3.31              | 3.63       |
| La   | 2.84       | 5.48       | 3.02                          | 5.11       |            |            | 3.07              | 4.51       |
| Ce   | 2.77       | 5.38       | 3.09                          | 4.77       |            |            |                   |            |
| Pr   | 2.86       | 5.13       |                               |            |            |            |                   |            |
| Nd   | 2.87       | 5.24       |                               |            |            |            |                   |            |
| Pm   | 2.88       | 5.35       |                               |            |            |            |                   |            |
| Sm   | 2.91       | 5.44       |                               |            |            |            |                   |            |
| Eu   | 2.88       | 5.58       |                               |            |            |            |                   |            |
| Gd   | 3.17       | 5.95       |                               |            |            |            |                   |            |
| Tb   | 3.02       | 5.67       |                               |            |            |            |                   |            |
| Dy   | 3.06       | 5.74       |                               |            |            |            |                   |            |
| Ho   | 3.13       | 5.78       |                               |            |            |            |                   |            |
| Er   | 3.19       | 5.83       |                               |            |            |            |                   |            |
| Tm   | 3.25       | 5.87       |                               |            |            |            |                   |            |
| Yb   | 3.29       | 5.93       |                               |            |            |            |                   |            |
| Lu   | 2.96       | 4.93       |                               |            |            |            |                   |            |
| Hf   | 3.70       | 6.80       | 3.50                          | 7.00       |            |            | 3.38              | 7.50       |
| Ta   | 5.10       | 5.70       | 4.11                          | 7.57       |            |            | 3.76              | 7.24       |
| W    | 4.63       | 6.62       | 4.40                          | 7.17       |            |            | 4.68              | 7.47       |
| Re   | 3.96       | 7.84       | 3.95                          | 7.87       |            |            | 3.57              | 8.12       |
| Os   | 5.14       | 7.26       | 4.89                          | 7.62       |            |            | 4.81              | 8.36       |
| Ir   | 5.00       | 8.00       | 5.33                          | 7.54       |            |            | 5.43              | 7.45       |
| Pt   | 4.79       | 8.86       | 5.56                          | 6.87       |            |            | 5.47              | 6.13       |
| Au   | 4.89       | 5.17       | 5.77                          | 6.92       |            |            | 5.64              | 3.57       |
| Hg   | 6.27       | 8.32       | 5.22                          | 10.44      |            |            | 4.66              | 11.31      |
| Tl   | 3.20       | 5.80       | 3.24                          | 5.73       |            |            | 2.82              | 5.11       |
| Pb   | 3.90       | 7.06       | 3.89                          | 7.05       |            |            | 4.13              | 5.74       |
| Bi   | 4.69       | 7.48       | 4.12                          | 6.35       |            |            | 4.68              | 8.05       |
| Po   | 4.21       | 8.42       | 5.16                          | 6.52       |            |            | 5.04              | 6.41       |
| At   | 4.75       | 9.50       |                               |            |            |            | 6.50              | 6.91       |
| Rn   | 5.37       | 10.74      |                               |            |            |            | 4.36              | 14.68      |
| Fr   | 2.00       | 4.00       |                               |            |            |            |                   |            |
| Ra   | 2.84       | 4.87       |                               |            |            |            |                   |            |
| Ac   | 2.84       | 5.67       |                               |            |            |            |                   |            |
| Th   | 3.18       | 5.81       |                               |            |            |            |                   |            |
| Pa   | 2.99       | 5.81       |                               |            |            |            |                   |            |
| U    | 3.34       | 5.71       |                               |            |            |            |                   |            |
| Np   | 3.55       | 5.43       |                               |            |            |            |                   |            |
| Pu   | 3.24       | 5.64       |                               |            |            |            |                   |            |
| Am   | 2.99       | 6.01       |                               |            |            |            |                   |            |
| Cm   | 2.83       | 6.38       |                               |            |            |            |                   |            |
| Bk   | 3.19       | 6.07       |                               |            |            |            |                   |            |
| Cf   | 3.20       | 6.20       |                               |            |            |            |                   |            |
| Es   | 3.33       | 6.18       |                               |            |            |            |                   |            |
| Fm   | 3.40       | 6.20       |                               |            |            |            |                   |            |
| Md   | 3.47       | 6.22       |                               |            |            |            |                   |            |
| No   | 3.48       | 6.35       |                               |            |            |            |                   |            |
| Lr   | 3.50       | 6.40       |                               |            |            |            |                   |            |

Table S10: Radii of the isolated ions (Angstrom), computed at the UHF/def2qzvpp level of theory and used as input for the FC-Qeq and I-Qeq methods.

| atom | -5    | -4    | -3    | -2    | -1    | 0     | +1    | +2    | +3    | +4    | +5    |
|------|-------|-------|-------|-------|-------|-------|-------|-------|-------|-------|-------|
| H    | 1.396 | 1.422 | 1.464 | 1.430 | 1.100 | 0.752 | 0.000 | 0.000 | 0.000 | 0.000 | 0.000 |
| He   | 0.909 | 0.914 | 0.923 | 0.938 | 0.791 | 0.487 | 0.397 | 0.000 | 0.000 | 0.000 | 0.000 |
| Li   | 4.191 | 3.998 | 3.899 | 3.403 | 2.725 | 2.049 | 0.299 | 0.314 | 0.000 | 0.000 | 0.000 |
| Be   | 2.665 | 2.537 | 2.374 | 2.120 | 1.777 | 1.402 | 1.208 | 0.258 | 0.226 | 0.000 | 0.000 |
| B    | 2.227 | 2.078 | 1.890 | 1.628 | 1.321 | 1.084 | 0.953 | 0.867 | 0.187 | 0.177 | 0.000 |
| C    | 1.690 | 1.560 | 1.413 | 1.230 | 1.017 | 0.873 | 0.781 | 0.727 | 0.679 | 0.227 | 0.146 |
| N    | 1.356 | 1.253 | 1.111 | 0.985 | 0.848 | 0.729 | 0.661 | 0.614 | 0.590 | 0.559 | 0.108 |
| O    | 1.166 | 1.072 | 0.960 | 0.826 | 0.723 | 0.637 | 0.573 | 0.535 | 0.508 | 0.497 | 0.475 |
| F    | 1.002 | 0.932 | 0.849 | 0.750 | 0.627 | 0.562 | 0.512 | 0.474 | 0.450 | 0.433 | 0.429 |
| Ne   | 0.944 | 0.884 | 0.812 | 0.728 | 0.627 | 0.501 | 0.461 | 0.430 | 0.405 | 0.389 | 0.378 |
| Na   | 4.942 | 4.718 | 4.448 | 3.986 | 3.031 | 2.228 | 0.398 | 0.440 | 0.401 | 0.380 | 0.367 |
| Mg   | 3.380 | 3.219 | 3.013 | 2.689 | 2.252 | 1.724 | 1.506 | 0.353 | 0.369 | 0.345 | 0.330 |
| Al   | 2.755 | 2.597 | 2.398 | 2.135 | 1.817 | 1.519 | 1.289 | 1.187 | 1.496 | 0.322 | 0.304 |
| Si   | 2.167 | 2.041 | 1.887 | 1.702 | 1.487 | 1.312 | 1.175 | 1.055 | 0.994 | 0.227 | 0.284 |
| P    | 1.795 | 1.688 | 1.561 | 1.427 | 1.283 | 1.147 | 1.054 | 0.976 | 0.902 | 0.860 | 0.239 |
| S    | 1.618 | 1.517 | 1.396 | 1.248 | 1.133 | 1.031 | 0.949 | 0.892 | 0.841 | 0.791 | 0.761 |
| Cl   | 1.452 | 1.372 | 1.274 | 1.157 | 1.010 | 0.932 | 0.869 | 0.817 | 0.778 | 0.742 | 0.707 |
| Ar   | 1.336 | 1.271 | 1.192 | 1.100 | 0.988 | 0.848 | 0.798 | 0.757 | 0.720 | 0.692 | 0.665 |
| K    | 5.508 | 5.590 | 5.008 | 4.275 | 3.447 | 2.772 | 0.583 | 0.794 | 0.752 | 0.722 | 0.698 |
| Ca   | 4.347 | 4.127 | 3.854 | 3.411 | 2.828 | 2.231 | 1.972 | 0.762 | 0.691 | 0.663 | 0.642 |
| Sc   | 3.615 | 3.379 | 3.102 | 2.684 | 1.951 | 1.688 | 1.349 | 1.606 | 0.396 | 0.612 | 0.594 |
| Ti   | 3.205 | 2.963 | 2.678 | 2.283 | 1.638 | 1.384 | 1.088 | 0.753 | 0.655 | 0.643 | 0.556 |
| V    | 2.753 | 2.462 | 2.298 | 1.840 | 1.412 | 1.185 | 0.934 | 0.669 | 0.609 | 0.562 | 0.643 |
| Cr   | 2.410 | 2.195 | 1.982 | 1.613 | 1.245 | 0.927 | 0.830 | 0.623 | 0.567 | 0.530 | 0.496 |
| Mn   | 2.277 | 2.080 | 1.861 | 1.551 | 1.245 | 0.851 | 0.751 | 0.582 | 0.536 | 0.498 | 0.470 |
| Fe   | 2.088 | 1.898 | 1.664 | 1.425 | 1.081 | 0.783 | 0.696 | 0.553 | 0.507 | 0.475 | 0.446 |
| Co   | 1.847 | 1.661 | 1.496 | 1.252 | 0.929 | 0.725 | 0.577 | 0.524 | 0.485 | 0.453 | 0.428 |
| Ni   | 1.621 | 1.488 | 1.382 | 1.157 | 0.912 | 0.677 | 0.546 | 0.497 | 0.463 | 0.435 | 0.412 |
| Cu   | 1.635 | 1.463 | 1.270 | 1.052 | 0.810 | 0.682 | 0.517 | 0.475 | 0.444 | 0.420 | 0.399 |
| Zn   | 1.516 | 1.368 | 1.206 | 1.020 | 0.824 | 0.641 | 0.540 | 0.454 | 0.424 | 0.399 | 0.380 |
| Ga   | 1.360 | 1.235 | 1.100 | 0.951 | 0.798 | 0.660 | 0.553 | 0.479 | 0.408 | 0.433 | 0.365 |
| Ge   | 1.194 | 1.092 | 0.987 | 0.874 | 0.757 | 0.656 | 0.570 | 0.494 | 0.434 | 0.373 | 0.355 |
| As   | 1.122 | 1.029 | 0.930 | 0.830 | 0.732 | 0.643 | 0.574 | 0.511 | 0.451 | 0.399 | 0.345 |
| Se   | 1.044 | 0.964 | 0.875 | 0.785 | 0.705 | 0.633 | 0.570 | 0.517 | 0.467 | 0.416 | 0.370 |
| Br   | 0.992 | 0.921 | 0.831 | 0.757 | 0.679 | 0.618 | 0.565 | 0.517 | 0.474 | 0.431 | 0.387 |
| Kr   | 0.936 | 0.885 | 0.821 | 0.732 | 0.669 | 0.601 | 0.556 | 0.515 | 0.476 | 0.439 | 0.402 |
| Rb   | 6.846 | 6.196 | 5.547 | 4.780 | 3.772 | 2.930 | 0.484 | 0.938 | 0.899 | 0.868 | 0.834 |
| Sr   | 4.270 | 4.140 | 3.793 | 3.445 | 2.985 | 2.418 | 2.148 | 1.095 | 0.844 | 0.817 | 0.796 |
| Y    | 3.640 | 3.406 | 3.356 | 2.945 | 2.210 | 1.914 | 1.914 | 1.787 | 0.608 | 0.773 | 0.754 |
| Zr   | 3.129 | 3.047 | 2.786 | 2.455 | 1.831 | 1.625 | 1.364 | 1.353 | 1.556 | 0.898 | 0.717 |
| Nb   | 2.904 | 2.622 | 2.412 | 2.033 | 1.622 | 1.303 | 1.201 | 0.991 | 0.909 | 0.863 | 0.805 |
| Mo   | 2.610 | 2.397 | 2.185 | 1.822 | 1.469 | 1.172 | 1.088 | 0.908 | 0.854 | 0.813 | 0.781 |
| Tc   | 2.487 | 2.188 | 2.035 | 1.752 | 1.326 | 1.172 | 0.999 | 0.850 | 0.807 | 0.771 | 0.742 |
| Ru   | 2.207 | 2.007 | 1.781 | 1.513 | 1.215 | 1.080 | 0.861 | 0.806 | 0.762 | 0.736 | 0.706 |
| Rh   | 2.043 | 1.857 | 1.716 | 1.472 | 1.055 | 0.939 | 0.808 | 0.760 | 0.723 | 0.691 | 0.668 |
| Pd   | 1.722 | 1.607 | 1.375 | 1.164 | 0.986 | 0.823 | 0.766 | 0.724 | 0.691 | 0.663 | 0.639 |
| Ag   | 1.935 | 1.846 | 1.552 | 1.246 | 0.988 | 0.835 | 0.727 | 0.691 | 0.661 | 0.637 | 0.615 |
| Cd   | 1.658 | 1.504 | 1.364 | 1.189 | 1.006 | 0.834 | 0.741 | 0.660 | 0.684 | 0.612 | 0.593 |
| In   | 1.771 | 1.601 | 1.413 | 1.205 | 1.004 | 0.852 | 0.744 | 0.675 | 0.608 | 0.588 | 0.572 |
| Sn   | 1.542 | 1.413 | 1.264 | 1.107 | 0.953 | 0.843 | 0.756 | 0.679 | 0.622 | 0.564 | 0.592 |
| Sb   | 1.388 | 1.279 | 1.156 | 1.037 | 0.925 | 0.829 | 0.758 | 0.694 | 0.632 | 0.583 | 0.531 |
| Te   | 1.275 | 1.195 | 1.094 | 0.982 | 0.893 | 0.816 | 0.751 | 0.696 | 0.644 | 0.592 | 0.548 |
| I    | 1.221 | 1.142 | 1.052 | 0.961 | 0.862 | 0.797 | 0.742 | 0.692 | 0.647 | 0.603 | 0.557 |
| Xe   | 1.168 | 1.105 | 1.032 | 0.939 | 0.861 | 0.778 | 0.730 | 0.687 | 0.646 | 0.607 | 0.568 |
| Cs   | 6.467 | 6.100 | 5.835 | 5.309 | 4.210 | 3.207 | 0.976 | 1.134 | 1.093 | 1.064 | 1.039 |
| Ba   | 4.831 | 4.610 | 4.357 | 3.900 | 2.769 | 2.705 | 2.417 | 0.352 | 1.042 | 1.017 | 1.000 |
| La   | 3.828 | 3.802 | 3.411 | 3.357 | 2.507 | 1.965 | 1.851 | 2.038 | 0.174 | 0.961 | 0.940 |
| Hf   | 1.737 | 1.653 | 1.494 | 1.280 | 1.134 | 1.009 | 0.891 | 0.830 | 0.783 | 0.690 | 0.674 |
| Ta   | 1.649 | 1.517 | 1.413 | 1.239 | 1.079 | 0.974 | 0.869 | 0.805 | 0.777 | 0.742 | 0.660 |
| W    | 1.548 | 1.449 | 1.314 | 1.176 | 1.032 | 0.904 | 0.816 | 0.768 | 0.729 | 0.695 | 0.664 |
| Re   | 1.515 | 1.409 | 1.279 | 1.154 | 1.028 | 0.907 | 0.820 | 0.813 | 0.720 | 0.689 | 0.662 |
| Os   | 1.534 | 1.368 | 1.277 | 1.094 | 0.947 | 0.874 | 0.825 | 0.761 | 0.704 | 0.679 | 0.655 |
| Ir   | 1.464 | 1.309 | 1.183 | 1.048 | 0.911 | 0.845 | 0.765 | 0.721 | 0.692 | 0.667 | 0.647 |
| Pt   | 1.325 | 1.261 | 1.139 | 0.957 | 0.877 | 0.816 | 0.736 | 0.705 | 0.677 | 0.655 | 0.634 |
| Au   | 1.399 | 1.277 | 1.141 | 0.997 | 0.847 | 0.790 | 0.714 | 0.686 | 0.662 | 0.642 | 0.623 |
| Hg   | 1.287 | 1.190 | 1.088 | 0.978 | 0.867 | 0.763 | 0.712 | 0.668 | 0.647 | 0.628 | 0.611 |
| Tl   | 1.464 | 1.330 | 1.185 | 1.029 | 0.884 | 0.780 | 0.711 | 0.671 | 0.634 | 0.617 | 0.602 |
| Pb   | 1.285 | 1.186 | 1.076 | 0.964 | 0.856 | 0.779 | 0.720 | 0.669 | 0.635 | 0.603 | 0.589 |
| Bi   | 1.186 | 1.100 | 1.008 | 0.921 | 0.840 | 0.771 | 0.720 | 0.676 | 0.634 | 0.605 | 0.576 |
| Po   | 1.159 | 1.069 | 0.988 | 0.896 | 0.824 | 0.764 | 0.716 | 0.677 | 0.640 | 0.605 | 0.579 |
| At   | 1.117 | 1.044 | 0.966 | 0.882 | 0.805 | 0.754 | 0.712 | 0.675 | 0.642 | 0.610 | 0.579 |
| Rn   | 1.087 | 1.030 | 0.962 | 0.875 | 0.810 | 0.742 | 0.705 | 0.671 | 0.640 | 0.612 | 0.584 |

## 2 EQeq charge centers

Table S11: For the elements included in the def2qzvpp basis set, the charge centers used as input for the EQeq program, are reported. The lowest common oxidation states<sup>S3</sup> is generally adopted. It is set to zero for non-metal atoms or lowered in case of unavailable experimental data.

| atom | EQeq/ox input<br>charge center | atom | EQeq/ox input<br>charge center |
|------|--------------------------------|------|--------------------------------|
| H    | 0                              | Tc   | 2                              |
| He   | 0                              | Ru   | 2                              |
| Li   | 1                              | Rh   | 2                              |
| Be   | 2                              | Pd   | 2                              |
| B    | 0                              | Ag   | 1                              |
| C    | 0                              | Cd   | 2                              |
| N    | 0                              | In   | 3                              |
| O    | 0                              | Sn   | 2                              |
| F    | 0                              | Sb   | 3                              |
| Ne   | 0                              | Te   | 0                              |
| Na   | 1                              | I    | 0                              |
| Mg   | 2                              | Xe   | 0                              |
| Al   | 3                              | Cs   | 1                              |
| Si   | 4                              | Ba   | 1                              |
| P    | 0                              | La   | 2                              |
| S    | 0                              | Ce   | 3                              |
| Cl   | 0                              | Pr   | 3                              |
| Ar   | 0                              | Nd   | 1                              |
| K    | 1                              | Pm   | 1                              |
| Ca   | 2                              | Sm   | 1                              |
| Sc   | 3                              | Eu   | 1                              |
| Ti   | 4                              | Gd   | 1                              |
| V    | 4                              | Tb   | 1                              |
| Cr   | 3                              | Dy   | 1                              |
| Mn   | 2                              | Ho   | 1                              |
| Fe   | 2                              | Er   | 1                              |
| Co   | 2                              | Tm   | 2                              |
| Ni   | 2                              | Yb   | 2                              |
| Cu   | 2                              | Lu   | 1                              |
| Zn   | 2                              | Hf   | 3                              |
| Ga   | 3                              | Ta   | 0                              |
| Ge   | 2                              | W    | 0                              |
| As   | 0                              | Re   | 0                              |
| Se   | 0                              | Os   | 0                              |
| Br   | 0                              | Ir   | 0                              |
| Kr   | 0                              | Pt   | 1                              |
| Rb   | 1                              | Au   | 1                              |
| Sr   | 2                              | Hg   | 1                              |
| Y    | 3                              | Tl   | 1                              |
| Zr   | 4                              | Pb   | 2                              |
| Nb   | 4                              | Bi   | 3                              |
| Mo   | 4                              | Po   | 0                              |

### 3 Structures containing $\text{ClO}_4^-$ ions

Table S12: List of structures containing positive DDEC charges on Cl: this feature is attributed to the presence of perchlorate floating anions inside the pores of the frameworks.

| <b>MOF's code</b> | <b>DDEC Cl charge</b> |
|-------------------|-----------------------|
| FAZRAA            | +1.57                 |
| IPIDAN            | +1.53                 |
| ITIWYOY           | +1.67                 |
| MIFQEY            | +1.54                 |
| OKITIM01          | +1.53                 |
| OKITIM02          | +1.52                 |
| OKITIM            | +1.80                 |
| OKIVAG01          | +1.61                 |
| OKIVAG            | +1.62                 |
| OKIVIO            | +1.80                 |
| OKIWEL01          | +1.50                 |
| OKIWEL02          | +1.33                 |
| OKIWEL            | +1.47                 |
| OKIWUB01          | +1.90                 |
| OKIWUB            | +1.90                 |
| OKIXIQ01          | +1.81                 |
| OKIXIQ02          | +1.83                 |
| OKIXIQ            | +1.85                 |
| OKIYAJ            | +2.06                 |
| OKIYIR03          | +1.37                 |
| OKIYIR            | +1.29                 |
| SAHYAD01          | +1.72                 |
| SAHYAD            | +1.93                 |
| SAHYIL            | +2.00                 |
| TAMJEY            | +1.57                 |
| WUNSEE01          | +1.75                 |
| WUNSEE02          | +1.51                 |
| WUNSEE            | +1.79                 |
| WUNSH01           | +1.61                 |
| WUNSH02           | +1.36                 |
| WUNSH             | +1.37                 |
| WUNTAB            | +1.56                 |
| WUNVIL            | +1.91                 |

## 4 Charge comparison for Cl and F

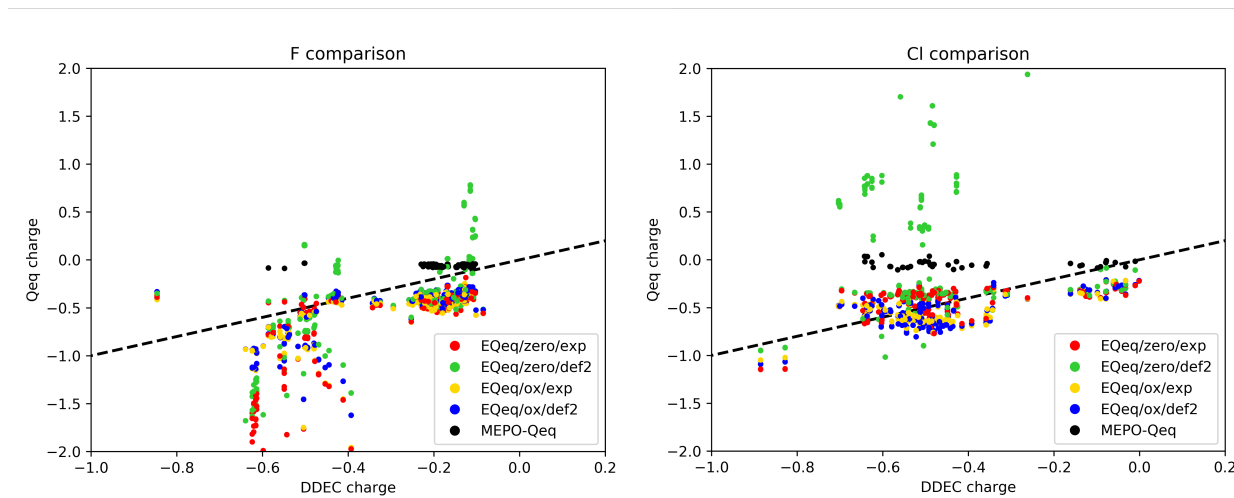

Figure S1: Comparison of point charges for the F and Cl atom types that are contained in the 2338 structures used as dataset in this work. Charges from calculations that are not converged, or from frameworks that contain elements that were not parametrized for MEPO-Qeq, are not shown.

## 5 Speed benchmark for the Qeq codes

Table S13: Speed benchmark for 13 common MOFs, on a 2.6 GHz Intel Ivy Bridge CPU and 3GB of RAM: the running time is reported in seconds. For Mg-MOF-74 the unit cell has been replicated on the xyz directions to test the performance for different number of atoms and volume. The EQeq method has been tested in its original form, applying a default expansion of the unit cell by 5x5x5 and the more precise expansion used in this work, i.e., 13x13x13.

| Framework (UC)      | Atoms/UC | Vol./UC( $\text{\AA}^3$ ) | FC-Qeq | I-Qeq   | PQeq  | EQeq (5) | EQeq (13) |
|---------------------|----------|---------------------------|--------|---------|-------|----------|-----------|
| HKUST-1 (DOTSOV02)  | 156      | 4527.8                    | 1      | 1       | 2     | 4        | 58        |
| IRMOF-1 (cubic)     | 424      | 17237.4                   | 6      | 7       | 10    | 27       | 431       |
| Mg-MOF-74 (111)     | 54       | 1359.4                    | <1     | <1      | 1     | <1       | 7         |
| Mg-MOF-74 (211)     | 108      | 2718.8                    | <1     | 1       | 2     | 2        | 27        |
| Mg-MOF-74 (222)     | 432      | 10875.5                   | 4      | 4       | 10    | 28       | 442       |
| Mg-MOF-74 (322)     | 648      | 16313.3                   | 11     | 13      | 16    | 60       | 970       |
| Mg-MOF-74 (333)     | 1458     | 36705                     | 60     | 64      | 91    | 341      | 4935      |
| Mg-MOF-74 (422)     | 864      | 21751.1                   | 23     | 25      | 25    | 111      | 1757      |
| Mg-MOF-74 (444)     | 3456     | 87004.4                   | 718    | 763     | 697   | 2496     | 27551     |
| Mg-MOF-74 (555)     | 6750     | 169930.7                  | crash  | crash   | 3939  | 11887    | 106881    |
| MIL-100 (cubic)     | 11152    | 387511.3                  | crash  | crash   | crash | 38113    | >250000   |
| MIL-100 (primitive) | 2788     | 96877.7                   | 322    | diverge | 424   | 1389     | 18964     |
| UIO-66 (cubic)      | 432      | 8870.2                    | 6      | 7       | 15    | 26       | 449       |



## 6 Partial charges of CO<sub>2</sub>

In this work we focused on the partial charges of the frameworks. However, it is interesting to compare the different charges that can be derived for the adsorbate molecule. In the TraPPE force fields, charges have been fitted together with the dispersion parameters, to better reproduce experimental data such as the vapour-liquid equilibrium (VLE).<sup>S4</sup> The parameters are therefore meant to be used for molecule-molecule interactions, but this does not imply that also the molecule-framework interactions are properly described. Contrary to dispersion parameter, where we can use two different potentials for the molecule-molecule and molecule-framework interaction, in the case of charges, a compromise should be found to describe both Coulombic interactions. Indeed, for each atom (or dummy bead) only one point charge can be assigned. Table S14 reports the charges that one can obtain for CO<sub>2</sub> from different schemes, placing the molecule at the center of a 30x30x30 Angstrom box. The CO bonds are the same as for TraPPE, i.e., the experimental value of 1.16 Angstrom. For Qeq and EQeq the standard parameters proposed for the method are used, i.e., GMP and experimental, respectively. As for the electron density derived charges, the calculation is based on the PBE electronic structure calculated with CP2K<sup>S5</sup> using the following settings: 700 Ry cutoff, 50 Ry relative cutoff with 4 grids, TZVP-MOLOPT-GTH gaussian basis set and GTH-PBE pseudopotentials. Mulliken, Hirshfeld and REPEAT charges are computed using the routines implemented in CP2K. DDEC charges are computed using the latest release of the program Charge-mol.<sup>S6</sup>

Table S14: Comparison of the partial charge on CO<sub>2</sub> as obtained from different methods.

| Method    | C charge | O charge |
|-----------|----------|----------|
| TraPPE    | 0.70     | -0.35    |
| PQeq      | 0.89     | -0.45    |
| EQeq      | 0.41     | -0.21    |
| Mulliken  | 0.32     | -0.16    |
| Hirshfeld | 0.61     | -0.30    |
| REPEAT    | 0.64     | -0.32    |
| DDEC      | 0.73     | -0.37    |

It is interesting to notice how the DFT derived charges that are supposed to fit the electrostatic potential (i.e., REPEAT and DDEC) get closer to the TraPPE’s partial charges. In particular the closest agreement is obtained with DDEC: therefore, we can

say that the TraPPE's partial charges are consistent with the method we used to compute the partial charges of the framework. On the other side, PQeq and EQeq show larger deviations.

## 7 Statistical coefficients used for the comparisons

### 7.1 Mean signed deviation

Given two sets,  $\{X\}$  and  $\{Y\}$ , composed by  $N$  values each:

$$\text{MSD} = \sum_i^N \frac{X_i - Y_i}{n} \quad (1)$$

where  $Y$  is taken as the reference set. Notice that positive and negative deviations may cancel each other out. Indeed, the mean signed deviation is only informative if compared to the mean absolute deviation: if the two values are the same (opposite) one can identify a systematic overestimation (underestimation) with respect to the reference set.

### 7.2 Mean absolute deviation

$$\text{MAD} = \sum_i^N \frac{|X_i - Y_i|}{n} \quad (2)$$

### 7.3 Pearson coefficient

The Pearson coefficient,  $\rho_{XY}$ , which quantifies the linear correlation between two sets of data, is defined as:

$$\rho_{XY} = \frac{\sum_i^N (X_i - \bar{X})(Y_i - \bar{Y})}{\sqrt{\sum_i^N (X_i - \bar{X})^2} \sqrt{\sum_i^N (Y_i - \bar{Y})^2}} \quad (3)$$

where  $\bar{X}$  and  $\bar{Y}$ , are the mean values over the two sets. The coefficient can span the range from -1 to 1: if  $\rho_{XY}$  is null the two sets are linearly uncorrelated.

### 7.4 Spearman coefficient

To compute the Spearman correlation coefficient  $r_s$ , the two sets of data  $\{X\}$  and  $\{Y\}$ , are first converted to ranks  $rgX$  and  $rgY$ . Then the Pearson coefficient is computed from

these ranks:

$$\rho_{XY} = \frac{\sum_i^N (rgX_i - \overline{rgX})(rgY_i - \overline{rgY})}{\sqrt{\sum_i^N (rgX_i - \overline{rgX})^2} \sqrt{\sum_i^N (rgY_i - \overline{rgY})^2}} \quad (4)$$

Two sets of data that are correlated in a non-linear fashion, e.g., exponentially, can give a near zero Pearson coefficient but they will lead to a Spearman coefficient close to 1 or -1. If instead the correlation is linear, the two coefficient must be similar.

## References

- (S1) Andersen, T.; Haugen, H. K.; Hotop, H. Binding Energies in Atomic Negative Ions: III. *J. Phys. Chem. Ref. Data* **1999**, *28*, 1511–1533.
- (S2) Moore, C. E. *Ionization potentials and ionization limits derived from the analyses of optical spectra*; 1970.
- (S3) Greenwood, N. N.; Earnshaw, A. *Chemistry of the Elements*; Butterworth-Heinemann, 1997.
- (S4) Potoff, J. J.; Siepmann, J. I. Vapor liquid equilibria of mixtures containing alkanes, carbon dioxide, and nitrogen. *AIChE J.* **2001**, *47*, 1676–1682.
- (S5) CP2K code and reference material is available at the project web page <http://www.cp2k.org>.
- (S6) Chargemol, release 09\_26\_2017, available at <https://sourceforge.net/projects/ddec/>.
